# Supplementary material
Source: publisher site journal article supplement (https://www.dovepress.com/article/268076)

**SUPPLEMENTAL DATA**

| **Table 1. Participants not included in final analysis** | | | | | |
| --- | --- | --- | --- | --- | --- |
| **Variable** | | **N** | **COPD** | **No COPD** | **P-value** |
| **Socio-demographics** | | 321 |  |  |  |
| Age, in years: Mean ± SD | |  | 46.3 (10.3) | 46.7 (10.8) | 0.904 |
| Sex: Female | |  | 8 (66.7) | 172 (55.7) | 0.648 |
| Head of house: Yes | |  | 10 (83.3) | 209 (68.3) | 0.432 |
| Working: Yes | |  | 11 (91.7) | 260 (85) | 0.821 |
| Marital status, n (%) | |  |  |  | 0.336 |
|  | Single |  | 1 (8.3) | 34 (11.1) |  |
|  | Married |  | 6 (50) | 197 (64.4) |  |
|  | Cohabiting |  | 3 (25) | 14 (4.6) |  |
|  | Separated/Divorced |  | 1 (8.3) | 30 (9.8) |  |
|  | Widow/Widower |  | 1 (8.3) | 25 (8.2) |  |
| **Household characteristics** | |  |  |  |  |
| Household size, median (IQR) | |  | 4 (2.8 , 4.2) | 5 (3 , 7) | 0.116 |
| Has chimney, n (%) | |  | 1 (9.1) | 26 (8.6) | 1 |
| Cooking location, n (%) | |  | 4 (2.8 , 4.2) | 5 (3 , 7) | 0.043 |
|  | Outside the house |  | 3 (25) | 155 (51.3) |  |
|  | Inside the main living area |  | 4 (33.3) | 34 (11.3) |  |
|  | In a separate room/hut |  | 5 (41.7) | 113 (37.4) |  |
| Fuel source | |  |  |  | 0.404 |
|  | Wood |  | 7 (58.3) | 122 (40.3) |  |
|  | Coal |  | 5 (41.7) | 169 (55.8) |  |
|  | Other |  | 0 (0) | 12 (4) |  |
| **Smoking status** | |  |  |  |  |
|  | Daily Smoker |  | 9 (75) | 267 (87.3) | 0.426 |
|  | Pack-years: Median (IQR) |  | 0 (0 , 0) | 0 (0 , 0) |  |
|  | Pack-years: Mean ± SD |  | 3.3 (7.7) | 0.9 (4.3) | 0.073 |
| **Lung function, median (IQR)** | |  |  |  |  |
|  | Pre-bronchodilator FEV |  | 1.5 (1.2 , 1.8) | 2.5 (2.1 , 3.1) | <0.000 |
|  | Pre-bronchodilator FVC |  | 2.8 (2.3 , 3.2) | 3.1 (2.6 , 3.8) | 0.088 |
|  | Pre-bronchodilator FEV/FVC ratio |  | 56.7 (50.4 , 60) | 81.2 (77.6 , 84.8) | <0.000 |
|  | Peak Expiratory Flow |  | 254.7 (191.5 , 304.9) | 408.6 (339.6 , 504) | <0.000 |
| Body mass index, mean (SD) | |  | 21.8 (4.7) | 21.9 (20.7 , 24.5) | 24.4 (21.6 , 28) |
| History of pulmonary tuberculosis, n (%) | |  | 7 (15.2%) | 1.5 (1.2 , 1.8) | 2.5 (2.1 , 3.1) |

**Supplement Figure 1. Peak expiratory flow (PEF) and the prevalence of COPD**

**
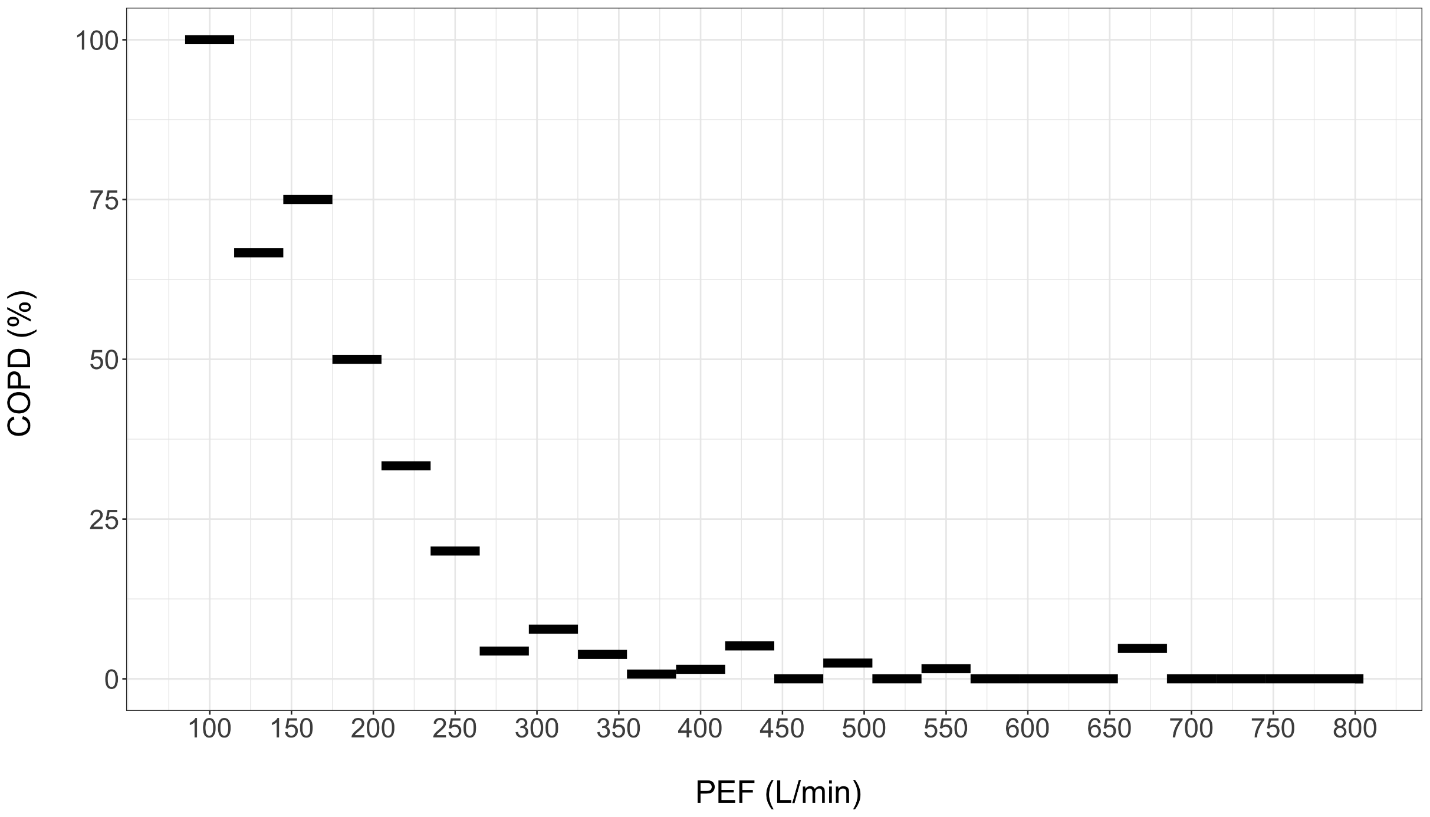
**

**Risk factors for COPD and diagnostic accuracy of demographic and respiratory questionnaires alone (six questions), peak expiratory flow (PEF) alone and combined questionnaires with PEF.** Odds of COPD (left panel) stratified by age and symptom score, PEF and combined age, symptoms/exposure score and PEF with 95% CI. Area under the curve (AUC) for COPD (right panel) stratified by age and symptom score, PEF and combined age, symptoms score and PEF with 95% CI.


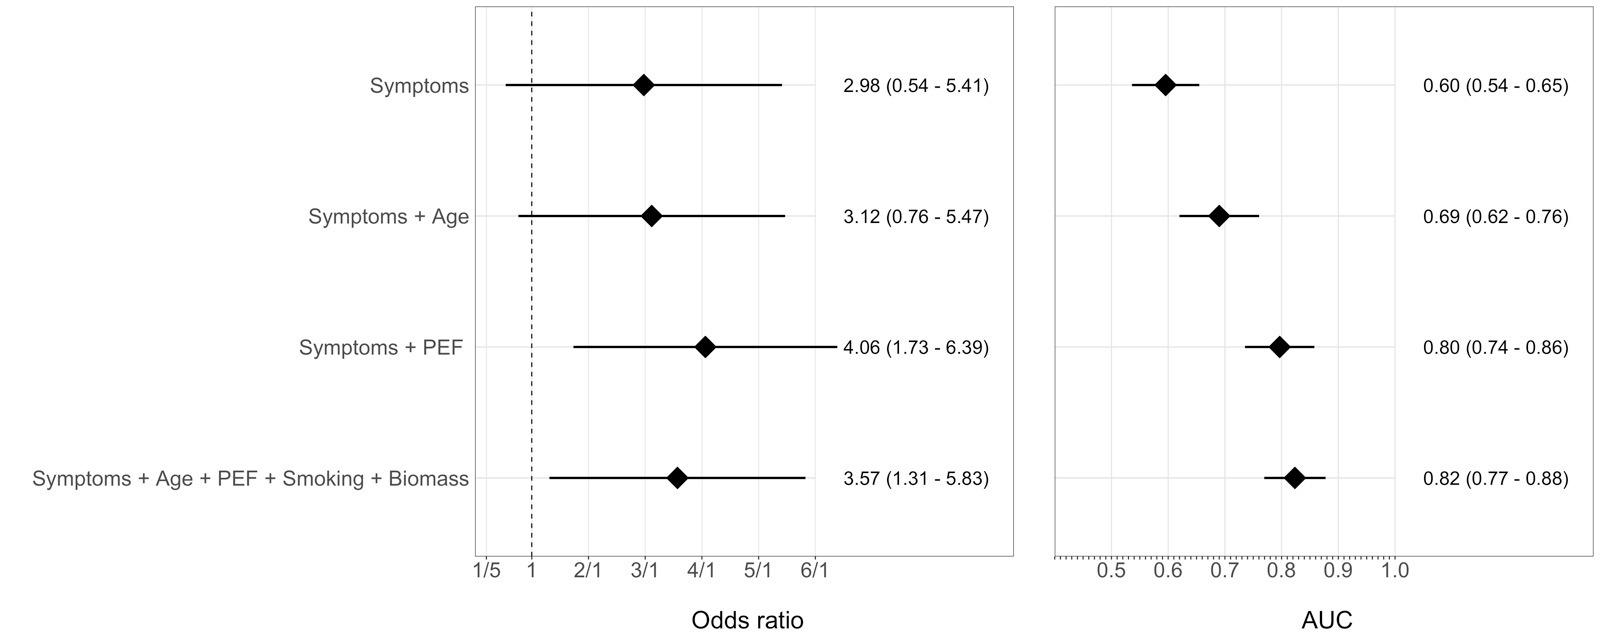


**Sensitivity Analysis using PEF cutoffs**

**450L/min**


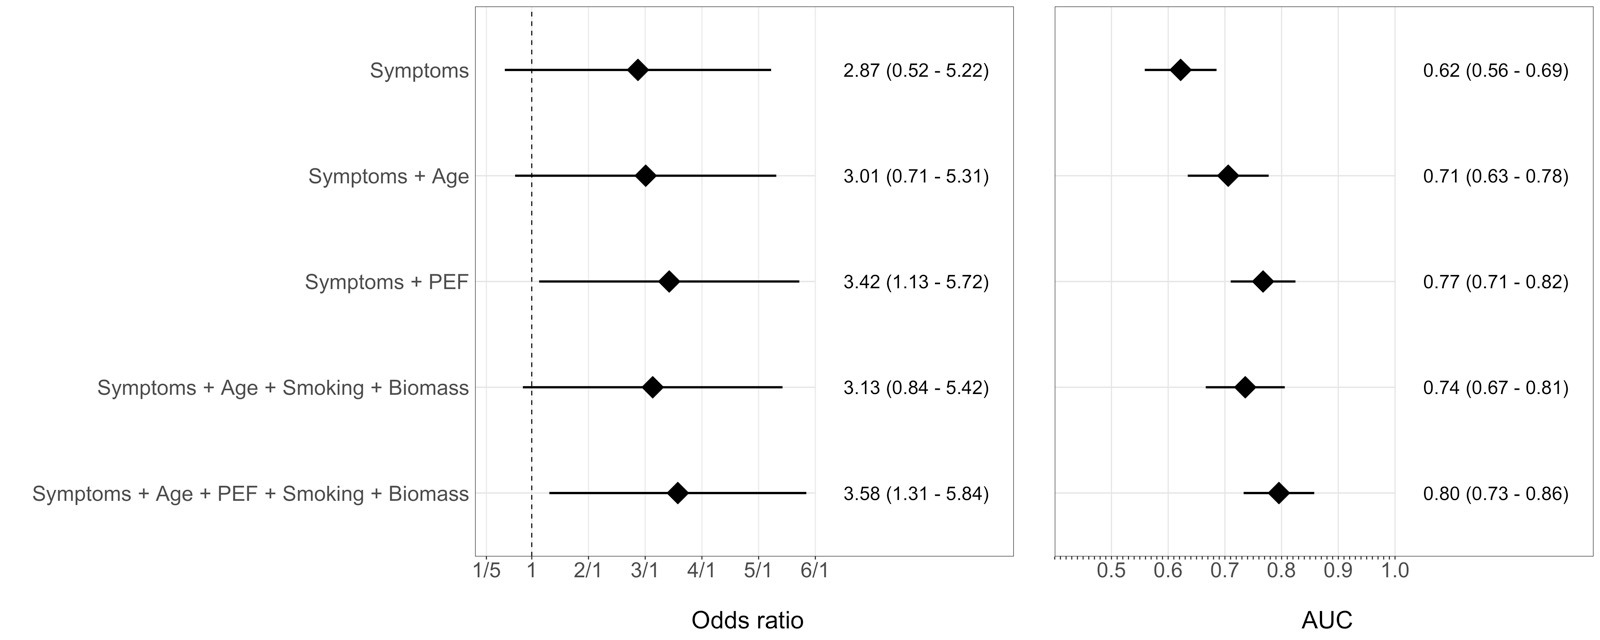


**400 L/min**


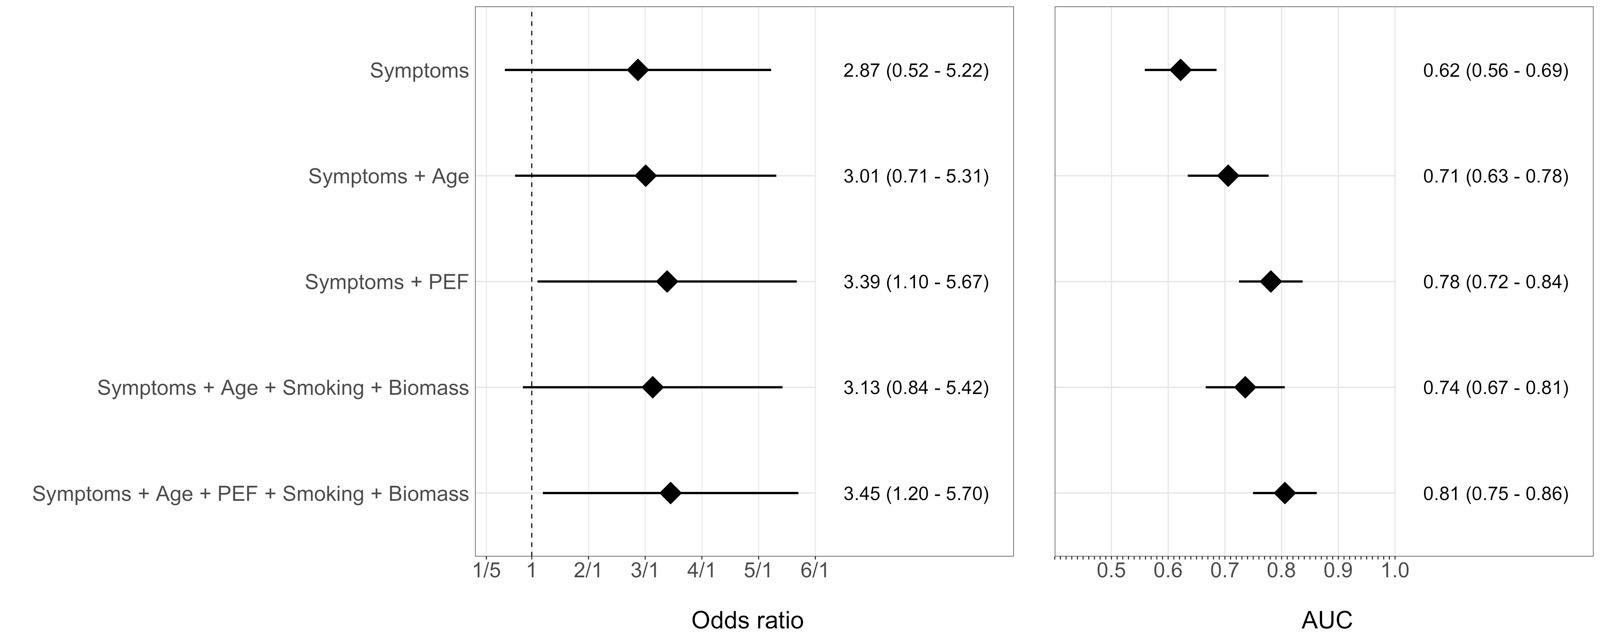

Supplement: Supplementary file 1 [file get_supplementary_file.php]
